# Supplementary material for: Borate and phosphite treatments of potato plants (Solanum tuberosum L.) as a proof of concept to reinforce the cell wall structure and reduce starch digestibility
Source: Royal Society of Chemistry journal article supplement (doi:10.1039/d1fo00801c), 2021-01-01
Supplement: d1fo00801c1.xlsx [file d1fo00801c1.xlsx]

## Sheet: Foglio1
Tuber fresh weight (g)
Ctrl	Kphi	Borate
85.3	49.4	46.3
99.5	29.2	55.9
60.7	57.5	38.1
71.4	20.9	49.9
35.2	17.3	174.8
38.3	35.4	29.4
25.7	15	63.9
116.6	31.9	70
149.7	24.2	65
68.8	20.7	40.5
59.5	55.3	81.2
24.4	24.1	117.2
17.7	10.7	69.8
22	7	68.7
27.7	39.8	31.3
50	38.1	142.9
4.9	28.9	78.9
69.1	46.8	36
51.9	29.9	54.9
85.9	15.9	83
31.8	4.6	74.1
30.1	24.2	67.1
73.5	39.7	33.6
49.8	34.8	69.1
54.2	6.8	31.7
27.5	24.7	41.7
40.7	8	34.2
34.1	27.8	26.5
17.3	66.8	50.2
24.3	37.9	51.4
29	36.2	92
18.7	24.9	56.8
19.4	15.3	65.5
21.8	27.9	38.1
21.2	21.9	21.8
30.1	8.8	50
18.1	16.2	29.9
23.2	19.1	30.4
34.3	24.8	32
12.9	22.3	35.8
16.6	18	28.7
7.7	19.3	29.4
7.8	16.8	26.3
13.7	11.3	30.3
6.4	17.8	20
7.6	11.7	7.8
22.6	18.9	26.6
16.2	17.7	23.2
17.8	15.8	23.6
11	12.7	18.6
15.1	12.7	8.5
26.9	8.2	14
15	7.6	12.5
17.8	6.8	19.2
13.6	5.9	4.6
15.9	5.5	20.1
6.9	4.2	20.7
7.8	4	9.4
14.2	4.5	14.4
6.3	5.1	18.1
6.7	4.6	5.4
6.4	4	25.2
4.8		12.5
6.2		23.9
7.7		26.6
5.2		20.7
7.6		23.8
6.2		23.9
5.9		14.8
6.4		18
4.4		21.8
5.5		18.5
4.2		19.6
4.5		14.2
4.8		9.6
4.7		10.8
5		7.2
4.3		17.5
4.1		4.6
4.1		15.6
4.3		13.6
		21
		14.9
		18.5
		7.9
		10.8
		5.3
		13.2
		6.4
		10.8
		19.2
		6.4
		5.5
		6.9
		4.2
		4.2
		5.9
		10.3
		8.1

## Sheet: Foglio2
Total yield (kg)
Ctrl	Kphi	Borate
2.1	1.3	3
1.8	1.5	3.3
2.5	1	2.5

## Sheet: Foglio3
TPC, mg GAE 100 g-1 FW
Ctrl	Kphi	Borate
17.2	35.63	18.4
26.14	68.34	21.2
25.69	26.5	20.7
16.17	29.03	22.51
22.5	33.82	16.33
21.28	32.57	16.39
27.95	55.85	21.7
19.5	20.78	18.8
22.01	50.12	23.5

## Sheet: Foglio4
% Starch hydrolysis (g/100 g)
Time	Ctrl									Kphi									Borate
0	0	0	0	0	0	0	0	0	0	0	0	0	0	0	0	0	0	0	0	0	0	0	0	0	0	0	0
20	1	1.1	0.8	1	1.3	0.7	0.8	1	1	1	0.9	1.9	0.5	1	1.1	1.2	0.9	0.8	0	0.1	0	0.3	0	0	0	0.2	0.5
40	1	1	0.7	1	1.2	0.6	1.4	1.1	0.4	2	2.7	1.7	1.9	1.4	0.9	2.4	2	2.1	1	1.5	1	1	1.3	0.9	1.1	0.7	0.5
60	1	0.9	1	1	1.3	0.8	0.8	0.5	0.9	1	1.1	1.4	0.9	0.7	1.1	1	1.3	0.8	0	0.2	0.9	0	0.2	0	0.1	0.5	0.3
80	1	1.5	1.1	0.6	1.4	0.8	0.9	1.2	1.1	2	0.9	1.7	2.2	2.3	2	1.6	1.9	1.7	2	2.1	1.7	1.2	2.2	2.4	1.2	2	1.8
100	1	1.1	0.8	1	1.3	0.7	0.8	1	1	1	1	0.5	1.5	0.8	0.7	1	1	0.9	1	1.2	0.9	0.9	0.7	0.5	1.6	1.3	0.8
120	17.6	5.2	17.2	7.2	27.3	6.2	18.2	2.2	2.1	4.7	2.4	4.5	3.3	6.9	1	2.5	3.7	4.3	2.1	3.1	3.2	1.6	3.5	2.5	2.9	1.9	1.6
121	14.1	17.7	12.7	10.9	15.8	18.6	14.5	13.2	12.2	5.4	13.8	3.1	10.7	6.1	16.8	5.7	10	19.2	10.6	8.1	12	7.5	8.8	9	9.5	11.8	7.5
125	14.7	19.3	18.1	15.1	11.9	20.2	17.9	20.9	20.7	7.4	14.8	20.1	5.5	12	9.9	8.3	6.5	16	11.3	21.5	6.9	25.7	18.9	5.2	16.4	18.5	24.4
130	13.1	21.6	11.1	25.2	15.9	10.8	25.8	20.3	12.9	10.4	16.4	20	7.9	13.7	12.1	19.5	14.4	9.9	29	23.1	24.4	21.7	33.3	27.7	20.6	25.9	29.8
140	39.6	45.5	47.8	36.2	47.1	42.2	39.9	37.5	45.4	30.6	35.8	39.9	30	28.1	34.7	35.9	20	28.8	38.3	34.8	37.7	35.9	32.3	35.6	38.9	33.1	38.8
180	59.9	64.4	58.1	65.7	64.5	55.9	62.1	61.9	60.9	57	49.4	60	42.6	55.7	48.7	53.9	52.5	54.6	61.9	63	61.4	63.8	62.1	62.7	62.9	61.7	62.4
240	67.3	72.8	70.1	67.9	75	77.2	64.8	71.1	69	63	54.4	66	51	66	64	59	52	56	66.5	69	66.8	68.4	66.9	67.9	68.1	70.2	64
300	77.8	70	73.1	81.3	65.8	66.9	81.6	74	76.5	63.6	56.3	66.6	60	62.2	55.9	56.5	62.1	49.2	73	66.7	69.9	72.8	62.9	63.9	77.7	68.5	69.7
360	82.9	73.6	85	70.5	68.1	77.3	75.2	80	87.2	67.3	58.6	69.8	70	59.1	51.7	57.6	64.8	65.2	79.7	69.7	83.5	66.1	68.8	77	85.9	69.9	72.2
